# Supplementary material
Source: Springer Nature journal article supplement (https://www.springermedizin.de/resource/supplementary/12935_2009_235_MOESM4_ESM.pdf/9540190)

a)

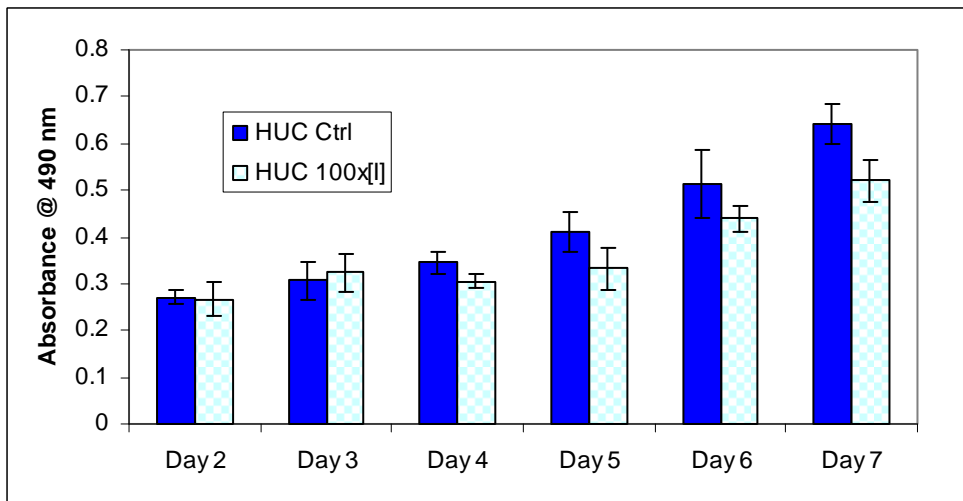

b)

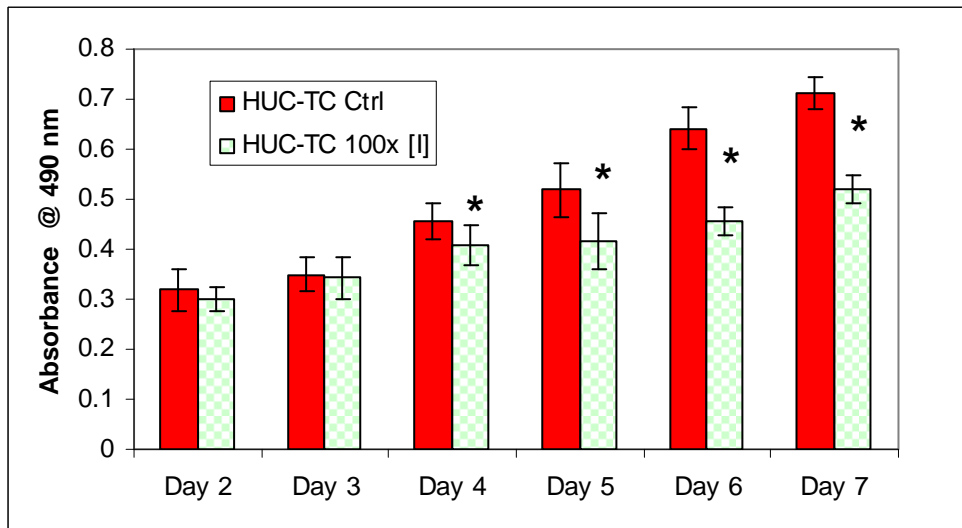

Supplement: MOESM4 [file 9540190]
